# Supplementary material
Source: PubMed Central journal article supplement (PMC7569487)
Supplement: NIHMS1634836-supplement-Supplemental_material.pdf [file NIHMS1634836-supplement-Supplemental_material.pdf]

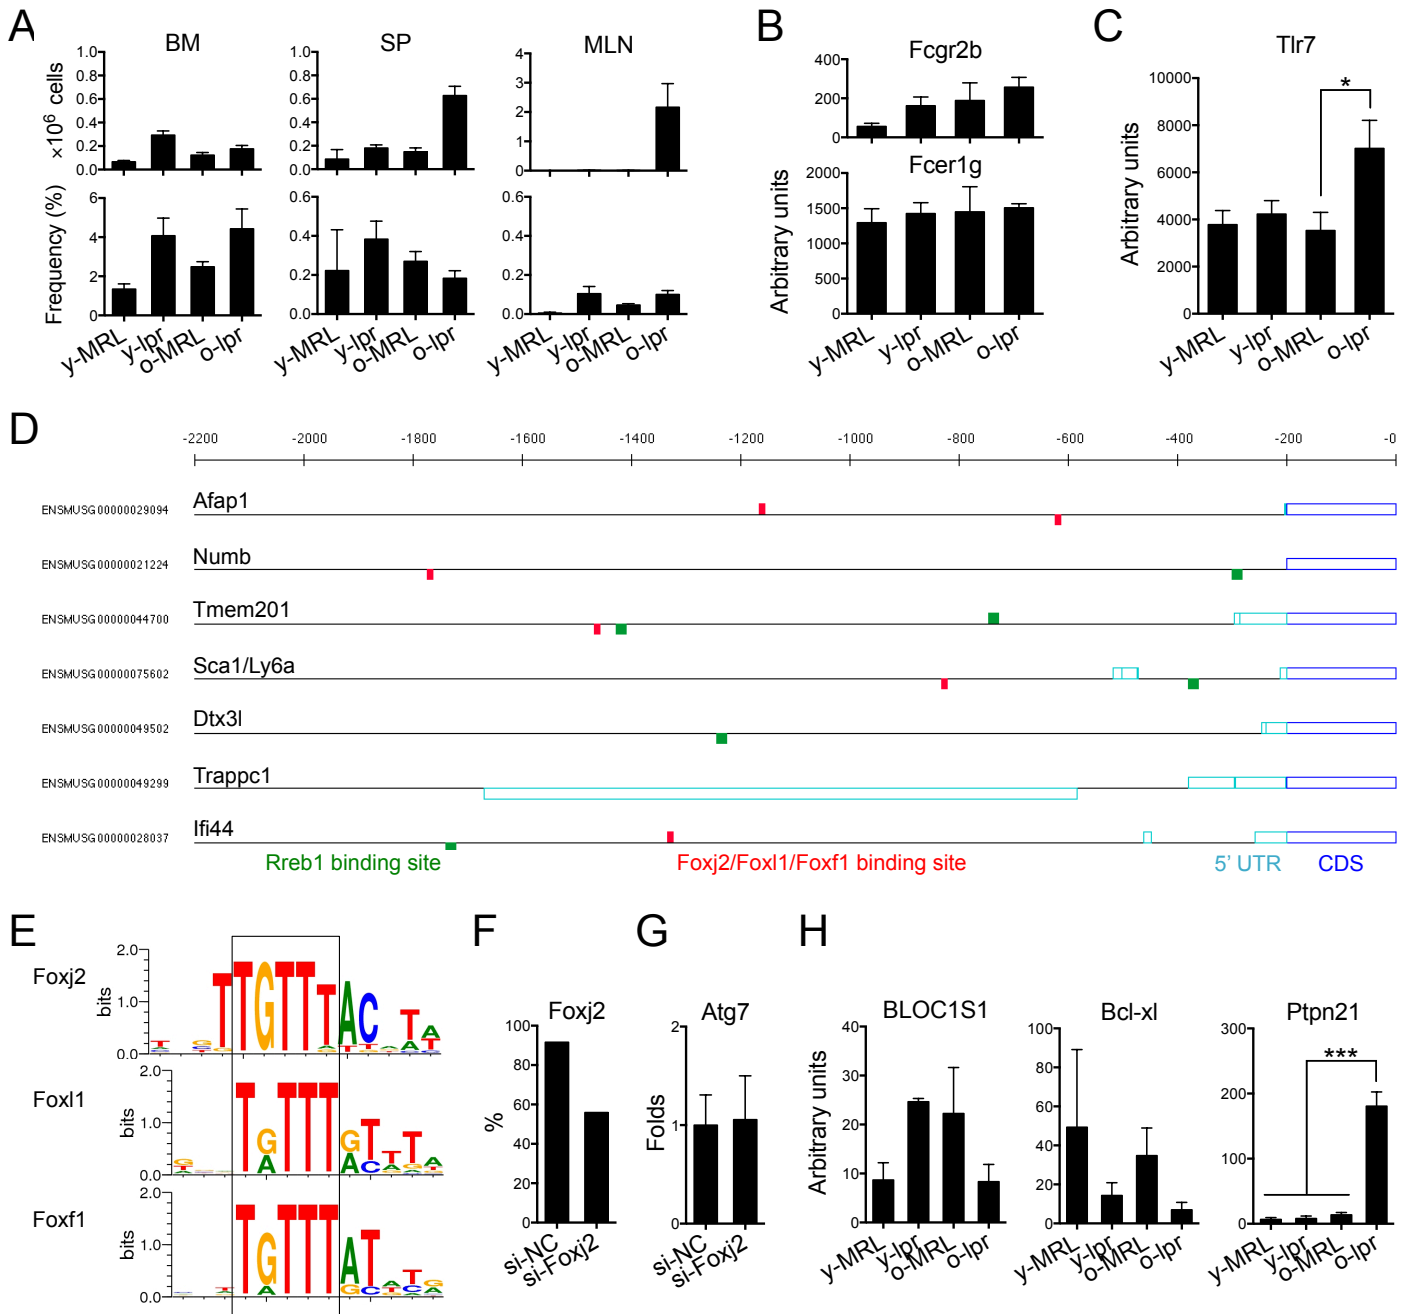

**Supplemental Fig. 1. PDCs unable to produce IFN $\alpha$  in late-stage lupus mice.** (A) Absolute cell numbers and frequencies of pDCs in bone marrow (BM), spleen (SP) and mesenteric lymph node (MLN). (B) Transcript levels of immune complex receptors Fcgr2b and Fcer1g. PDCs from these mice did not express Fcgr1 or Fcgr3. (C) Transcript levels of Tlr7. \* $P < 0.05$ , Student's  $t$ -test,  $n = 3$  per group. (D) Promoter analysis by using TOUCAN (<https://gbiomed.kuleuven.be/english/research/50000622/lcb/tools/toucan>). (E) Shared binding motif of Foxj2, Foxl1 and Foxf1. Maps were provided by MotifMap (<http://motifmap.ics.uci.edu/>). Only Foxj2 was expressed in the pDCs. (F) Transcript level of Foxj2 with negative control siRNA (si-NC) or Foxj2-specific siRNAs (si-Foxj2) in bone marrow cells from *lpr* mice. Percentages from the untransfected control are shown. (G) Transcript level of Atg7 after transfection with siRNAs. (H) Transcript levels of BLOC1S1 (subunit 1 of the lysosome-related BLOC1 complex), Bcl-xl, and Ptpn21.  $n \geq 3$  mouse per group. \*\*\* $P < 0.001$ , ANOVA.

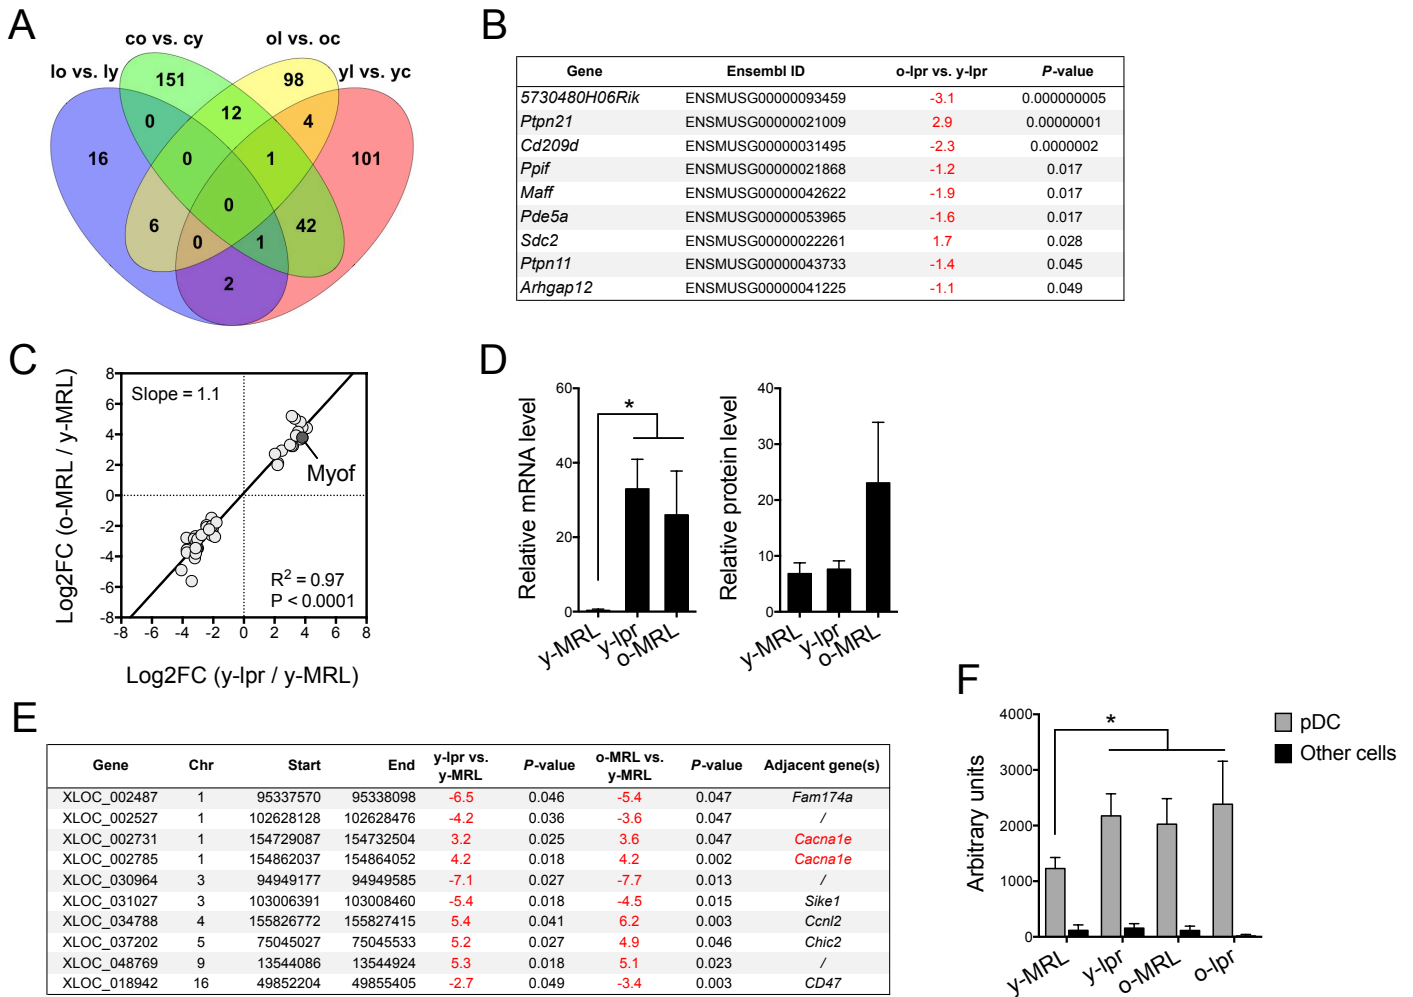

**Supplemental Fig. 2. Predisposed dysregulation of pDCs in lupus mice.** (A) Venn diagram showing the number of differentially expressed genes in 4 comparisons (FDR<0.1). Blue: older vs. younger in MRL/lpr mice. Green: older vs. younger in MRL mice. Yellow: MRL/lpr vs. MRL in older mice. Red: MRL/lpr vs. MRL in younger mice. (B) Differentially expressed genes between pDCs of older vs. younger MRL/lpr mice ( $P < 0.05$ ). (C) Log2 fold changes (FC) of 44 overlapped, differentially expressed genes in both Green and Red. (D) Transcript levels of *Myof* in sorted pDCs and protein levels of *Myof* in bone marrow pDCs. For protein levels, percentage and mean fluorescence intensity of *Myof*<sup>+</sup> pDCs were measured by using flow cytometry and the numbers were multiplied to represent the total expression level. \* $P < 0.05$ , student's *t*-test. Data are shown as mean + SEM ( $n = 3$  mice per group). (E) List of predicted lncRNAs that were overlapped. (F) Transcript level of *Cacna1e*, a gene next to predicted lncRNAs XLOC\_002731 and XLOC\_2785 on Chromosome 1. This gene appeared to be pDC-specific, and was upregulated in lupus mice with either early or late disease. The two predicted lncRNAs were also upregulated during lupus progression. \* $P < 0.05$ , Student's *t*-test,  $n = 3$  per group.
